# Supplementary material for: Biotransformation of camu–camu galloylated ellagitannins by Lactiplantibacillus plantarum with extracellular tannase activity
Source: Royal Society of Chemistry journal article supplement (doi:10.1039/d4fo00149d), 2024-01-01
Supplement: d4fo00149d1.pdf [file d4fo00149d1.pdf]

## Supplementary material

### Biotransformation of camu-camu galloylated ellagitannins by *Lactiplantibacillus plantarum* with extracellular tannase activity

Elena C. Pulido-Mateos, Jacob Lessard-Lord, Yves Desjardins, and Denis Roy

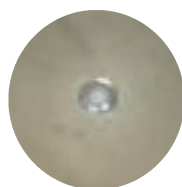

**Strains showing Est\_1092 activity**  
*L. plantarum* ATCC 8014

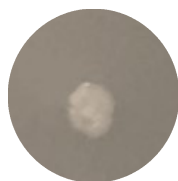

**Strain lacking Est\_1092 activity**  
*L. plantarum* WCFS1

**Figure S1. Detection of Est\_1092 activity in *L. plantarum* strains using the method developed by Donaghy et al. <sup>1</sup>. The enzymatic activity is evidenced by a surrounding clear halo.**

**Table S1. Identification of gallic acid derivatives, ellagic acid derivatives and ellagitannins in camu-camu extract and fermentation samples by UPLC-QToF**

| Class                              | Compound                           | Common name               | Retention time (min) | [M-H] <sup>-</sup> , <i>m/z</i> detected | Mass accuracy (ppm) | MS2 fragment. <i>m/z</i> (relative intensity)                                                                                                                      | ID level <sub>a</sub> |
|------------------------------------|------------------------------------|---------------------------|----------------------|------------------------------------------|---------------------|--------------------------------------------------------------------------------------------------------------------------------------------------------------------|-----------------------|
| <b>Gallic acid and derivatives</b> | Pyrogallol                         |                           | 3.70                 | 125.0235                                 | -3.2                | 95,0138 (100); 79,0191 (54)                                                                                                                                        | 1                     |
|                                    | Gallic acid                        |                           | 4.41                 | 169.0141                                 | -0.6                | 125,0243 (100); 79,0185 (17)                                                                                                                                       | 1                     |
| <b>Ellagic acid derivatives</b>    | Valoneic acid dilactone            |                           | 6.82                 | 469.0048                                 | -0.2                | 425.0137 (100); 299.9898 (59); 407.0026 (51)                                                                                                                       | 2                     |
|                                    | Ellagic acid hexoside              |                           | 8.96                 | 463.0514                                 | -0.9                | 300.9982 (100); 299.9914 (83)                                                                                                                                      | 2                     |
|                                    | Ellagic acid pentoside             |                           | 9.93                 | 433.0416                                 | 0.9                 | 299.9909 (100)                                                                                                                                                     | 2                     |
|                                    | Ellagic acid desoxyhexoside        |                           | 10.18                | 447.0574                                 | 1.1                 | 299.9908 (100)                                                                                                                                                     | 2                     |
|                                    | Ellagic acid                       |                           | 10.56                | 300.9994                                 | 1.3                 | 229.0138 (100)                                                                                                                                                     | 1                     |
|                                    | Ellagic acid acetyl-rhamnoside – 1 |                           | 11.67                | 489.0673                                 | -0.3                | 299.9908 (100)                                                                                                                                                     | 2                     |
|                                    | Ellagic acid acetyl-rhamnoside – 2 |                           | 11.81                | 489.0670                                 | -0.9                | 299.9908 (100)                                                                                                                                                     | 2                     |
|                                    | Ellagic acid glycoside – 1         |                           | 12.76                | 719.2175                                 | -1.7                | 300.9996 (100); 275.0196 (5)                                                                                                                                       | 2                     |
|                                    | Ellagic acid glycoside – 2         |                           | 12.95                | 719.2200                                 | 1.8                 | 300.9994 (100); 275.0189 (4)                                                                                                                                       | 2                     |
|                                    | Ellagic acid glycoside – 3         |                           | 13.33                | 719.2167                                 | -2.8                | 300.9991 (100); 275.0186 (4)                                                                                                                                       | 2                     |
|                                    | Ellagic acid glycoside – 4         |                           | 13.48                | 719.2174                                 | -1.8                | 300.9992 (100); 275.0200 (4)                                                                                                                                       | 2                     |
| <b>Ellagitannins</b>               | Vescalagin                         |                           | 5.81                 | 933.0636                                 | -0.4                | 915.0575 (100); 300.9990 (43); 493.0054 (38); 467.0251 (35); 569.0616 (24); 249.0398 (23); 871.0693 (22); 613.0490 (21); 275.0196 (19); 889.0867 (4); 631.0604 (3) | 1                     |
|                                    | Castalagin                         |                           | 6.56                 | 933.0641                                 | 0.1                 | 631.0570 (100); 300.9989 (42); 425.0146 (39); 569.0553 (20); 467.0238 (13); 249.0398 (12); 275.0198 (12); 915.0534 (8); 889.0748 (8); 871.0630 (6)                 | 2                     |
|                                    | Di-HHDP-glucose – 1                | Peduncalagin              | 6.16                 | 783.0686                                 | 0.0                 | 300.9987 (100); 275.0169 (39); 481.0637 (6); 249.0381 (3)                                                                                                          | 2                     |
|                                    | Di-HHDP-glucose – 2                | Peduncalagin              | 7.15                 | 783.0674                                 | -1.5                | 300.9986 (100); 275.0190 (50); 249.0394 (8); 481.0625 (6)                                                                                                          | 2                     |
|                                    | HHDP-galloyl-glucose               |                           | 7.93                 | 633.0728                                 | -0.8                | 300.9983 (100); 275.0189 (12); 463.0528 (4); 249.0392 (4)                                                                                                          | 2                     |
|                                    | Di-HHDP-galloyl-glucose – 1        | Casuarictin / Potentillin | 7.88                 | 935.0814                                 | 1.9                 | 917.0685 (100); 249.0390 (86); 275.0184 (66); 301.0000 (24); 573.0515 (24); 633.0737 (8)                                                                           | 2                     |
|                                    | Di-HHDP-galloyl-glucose – 2        | Casuarictin / Potentillin | 8.15                 | 935.0800                                 | 0.4                 | 275.0193 (100); 299.0192 (70); 633.0735 (69); 300.9987 (47); 249.0400 (26); 783.0661 (7)                                                                           | 2                     |
|                                    | Di-HHDP-galloyl-glucose – 3        | Casuarictin / Potentillin | 9.46                 | 935.0802                                 | 0.6                 | 300.9989 (100); 633.0731 (18); 275.0191 (17); 249.0396 (4); 783.0650 (2)                                                                                           | 2                     |
|                                    | Di-galloyl-HHDP-glucose            | Tellimagrandin I          | 8.46                 | 785.0851                                 | 1.0                 | 300.9981 (100); 275.0184 (38); 249.0384 (25); 169.0141 (13); 483.0787 (7); 633.0682 (4)                                                                            | 2                     |

---

|                          |                   |      |          |     |                                                                                                               |   |
|--------------------------|-------------------|------|----------|-----|---------------------------------------------------------------------------------------------------------------|---|
| Tri-galloyl-HHDP-glucose | Tellimagrandin II | 9.88 | 937.0960 | 0.7 | 300.9987 (100); 275.0196 (17); 169.0134 (12);<br>465.0677 (11); 767.0751 (11); 249.0390 (10);<br>741.1017 (3) | 2 |
|--------------------------|-------------------|------|----------|-----|---------------------------------------------------------------------------------------------------------------|---|

---

<sup>a</sup> Identification levels were established according to Sumner et al <sup>2</sup>. Level 1 identifications were validated by comparing RT and MS2 fragmentation spectra with an authentic standard, while level 2 identifications were proposed according to exact mass and MS2 fragmentation spectra compared to Fracassetti et al <sup>3</sup>.

**Table S2. *L. plantarum* isolates screened for *est\_1092* gene and feruloyl esterase activity**

| Culture Collection       | Isolate     | Isolation source  | Country of origin | <i>est_1092</i> gene | Feruloyl esterase activity |
|--------------------------|-------------|-------------------|-------------------|----------------------|----------------------------|
| Probi AB                 | 6A          | Human rectum      | Sweden            | -                    | -                          |
|                          | 12C         | Human, oral       | Sweden            | -                    | -                          |
|                          | 12D         | Human, oral       | Sweden            | -                    | -                          |
|                          | 32A         | Human, oral       | Sweden            | -                    | -                          |
|                          | 35C         | Human, oral       | Sweden            | -                    | -                          |
|                          | 36D         | Human, oral       | Sweden            | -                    | -                          |
|                          | 37C         | Human, oral       | Sweden            | -                    | -                          |
|                          | 39-26       | Fermented sorghum | Sweden            | -                    | -                          |
|                          | 39-27       | Sorghum           | Sweden            | -                    | -                          |
|                          | 42A         | Human rectum      | Sweden            | -                    | -                          |
|                          | 49-26       | Fermented sorghum | Sweden            | -                    | -                          |
|                          | 49-27       | Fermented sorghum | Sweden            | -                    | -                          |
|                          | 56-12       | Fermented sorghum | Sweden            | +                    | +                          |
|                          | 56-24       | Fermented sorghum | Sweden            | +                    | +                          |
|                          | 59-12       | Fermented sorghum | Sweden            | +                    | +                          |
|                          | 62C         | Human, oral       | Sweden            | -                    | -                          |
|                          | 67B         | Human rectum      | Sweden            | -                    | -                          |
|                          | 74-27       | Fermented sorghum | Sweden            | -                    | -                          |
|                          | 74-29       | Fermented sorghum | Sweden            | -                    | -                          |
|                          | 78B         | Human, oral       | Sweden            | -                    | -                          |
|                          | 81D         | Human, oral       | Sweden            | -                    | -                          |
|                          | 86C         | Human, oral       | Sweden            | -                    | -                          |
|                          | 88C         | Human, oral       | Sweden            | -                    | -                          |
|                          | 90-29       | Fermented sorghum | Sweden            | -                    | -                          |
|                          | 90-26       | Fermented sorghum | Sweden            | -                    | -                          |
|                          | 962         | Unknown           | Sweden            | -                    | -                          |
|                          | E12         | Human feces       | United Kingdom    | -                    | -                          |
|                          | I123        | Human feces       | Italy             | -                    | -                          |
|                          | I154        | Human feces       | Italy             | -                    | -                          |
|                          | I177        | Human feces       | Italy             | -                    | -                          |
|                          | S 71        | Human feces       | Sweden            | -                    | -                          |
|                          | S114        | Human feces       | Sweden            | -                    | -                          |
| S126                     | Human feces | Sweden            | -                 | -                    |                            |
| S144                     | Human feces | Sweden            | -                 | -                    |                            |
| S177                     | Human feces | Sweden            | -                 | -                    |                            |
| S204                     | Human feces | Sweden            | -                 | -                    |                            |
| S265                     | Human feces | Sweden            | -                 | -                    |                            |
| S268                     | Human feces | Sweden            | -                 | -                    |                            |
| Roy, Kennang, and Gagnon | RKG 1-473   | Corn silage       | Canada            | -                    | -                          |
|                          | RKG 1-500   | Bovine raw milk   | Canada            | -                    | -                          |
|                          | RKG 2-219   | Corn silage       | Canada            | -                    | -                          |
|                          | RKG 2-690   | Grass silage      | Canada            | -                    | -                          |

**Table S3. Pairwise genome comparison of the novel Est\_1092  
*L. plantarum* producing strains**

| <i>L. plantarum</i> strains |                                   |               |               |               |
|-----------------------------|-----------------------------------|---------------|---------------|---------------|
|                             | ATCC 8014                         | PROBI 56-12   | PROBI 56-24   | PROBI 59-12   |
|                             | ANI and (aligned nucleotides) (%) |               |               |               |
| <b>ATCC 8014</b>            | *                                 | 99.11 (91.44) | 99.12 (91.40) | 99.08 (91.50) |
| <b>PROBI 56-12</b>          | 99.11 (88.50)                     | *             | 99.97 (98.38) | 99.72 (94.06) |
| <b>PROBI 56-24</b>          | 99.11 (89.22)                     | 99.97 (99.15) | *             | 99.78 (94.46) |
| <b>PROBI 59-12</b>          | 99.08 (90.80)                     | 99.72 (96.61) | 99.78 (96.31) | *             |

Alignment performed with Mummer at  
<https://jspecies.ribohost.com/jspeciesws/>

**Table S4. Multiple sequence alignment of the genomic features encoding selected PAZymes in the Est\_1092+  
*L. plantarum* strains, performed in BV-BRC**

| Genomic feature | <i>L. plantarum</i> strain | Length (NT) | Length (AA) | ALN Length | Identity | Query cover | Subject cover | Hit from | Hit to | Score | E value   |
|-----------------|----------------------------|-------------|-------------|------------|----------|-------------|---------------|----------|--------|-------|-----------|
| Est_1092        | PROBI 56-12                | 888         | 295         | 295        | 100      | 100         | 100           | 1        | 295    | 619   | 0         |
|                 | PROBI 56-24                | 888         | 295         | 295        | 100      | 100         | 100           | 1        | 295    | 619   | 0         |
|                 | PROBI 59-12                | 888         | 295         | 295        | 100      | 100         | 100           | 1        | 295    | 619   | 0         |
| LpdB            | PROBI 56-12                | 609         | 202         | 202        | 100      | 100         | 93            | 16       | 202    | 386   | 2.00E-137 |
|                 | PROBI 56-24                | 609         | 202         | 202        | 100      | 100         | 93            | 16       | 202    | 386   | 2.00E-137 |
|                 | PROBI 59-12                | 609         | 202         | 202        | 100      | 100         | 93            | 16       | 202    | 386   | 2.00E-137 |
| LpdC            | PROBI 56-12                | 1473        | 490         | 490        | 100      | 100         | 100           | 1        | 490    | 1008  | 0         |
|                 | PROBI 56-24                | 1473        | 490         | 490        | 100      | 100         | 100           | 1        | 490    | 1008  | 0         |
|                 | PROBI 59-12                | 1473        | 490         | 490        | 100      | 100         | 100           | 1        | 490    | 1008  | 0         |

**Table S5. Multiple sequence alignment of the TanB genomic feature in the Est\_1092 and TanA-producing *L. plantarum* strains, performed in BV-BRC**

| <i>L. plantarum</i> strain | Length (NT) | Length (AA) | ALN Length | Identity | Query cover | Subject cover | Hit from | Hit to | Score | E value |
|----------------------------|-------------|-------------|------------|----------|-------------|---------------|----------|--------|-------|---------|
| PROBI S126                 | 1410        | 469         | 469        | 100      | 100         | 100           | 1        | 469    | 963   | 0       |
| PROBI S204                 | 1410        | 469         | 469        | 99       | 100         | 100           | 1        | 469    | 960   | 0       |
| PROBI 5612                 | 1410        | 469         | 469        | 100      | 100         | 100           | 1        | 469    | 961   | 0       |
| PROBI 5624                 | 1410        | 469         | 469        | 100      | 100         | 100           | 1        | 469    | 961   | 0       |
| PROBI 5912                 | 1410        | 469         | 469        | 100      | 100         | 100           | 1        | 469    | 961   | 0       |
| RKG 1-473                  | 1410        | 469         | 469        | 99       | 100         | 100           | 1        | 469    | 960   | 0       |
| RKG 1-500                  | 1410        | 469         | 469        | 99       | 100         | 100           | 1        | 469    | 960   | 0       |
| RKG 2-219                  | 1410        | 469         | 469        | 99       | 100         | 100           | 1        | 469    | 960   | 0       |
| RKG 2-690                  | 1410        | 469         | 469        | 99       | 100         | 100           | 1        | 469    | 957   | 0       |

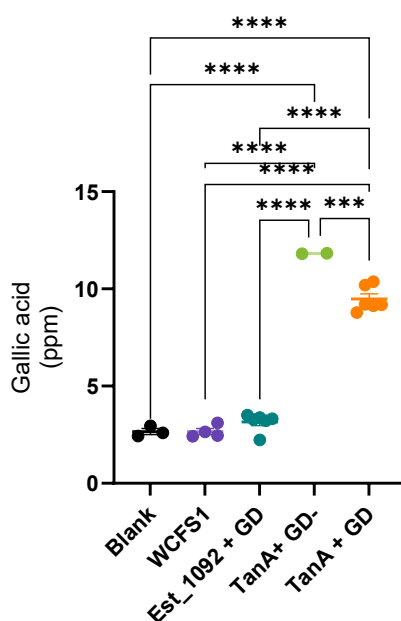

**Fig. S2 Gallic acid at the end of the fermentation of *L. plantarum* strains with different enzymatic capacities.** Each point represents the mean value of three independent experiments with one *L. plantarum* strain. Lines show mean values, and error bars indicate the standard error. Statistical significance was determined by a One-Way ANOVA analysis with Tukey-Kramer multiple comparisons, where \* ( $p < 0.05$ ), \*\* ( $p < 0.01$ ), \*\*\* ( $p < 0.001$ ) and \*\*\*\* ( $p < 0.0001$ ). Blank, uninoculated medium; GD+, strains producing gallate decarboxylase; GD-, strains lacking gallate decarboxylase.

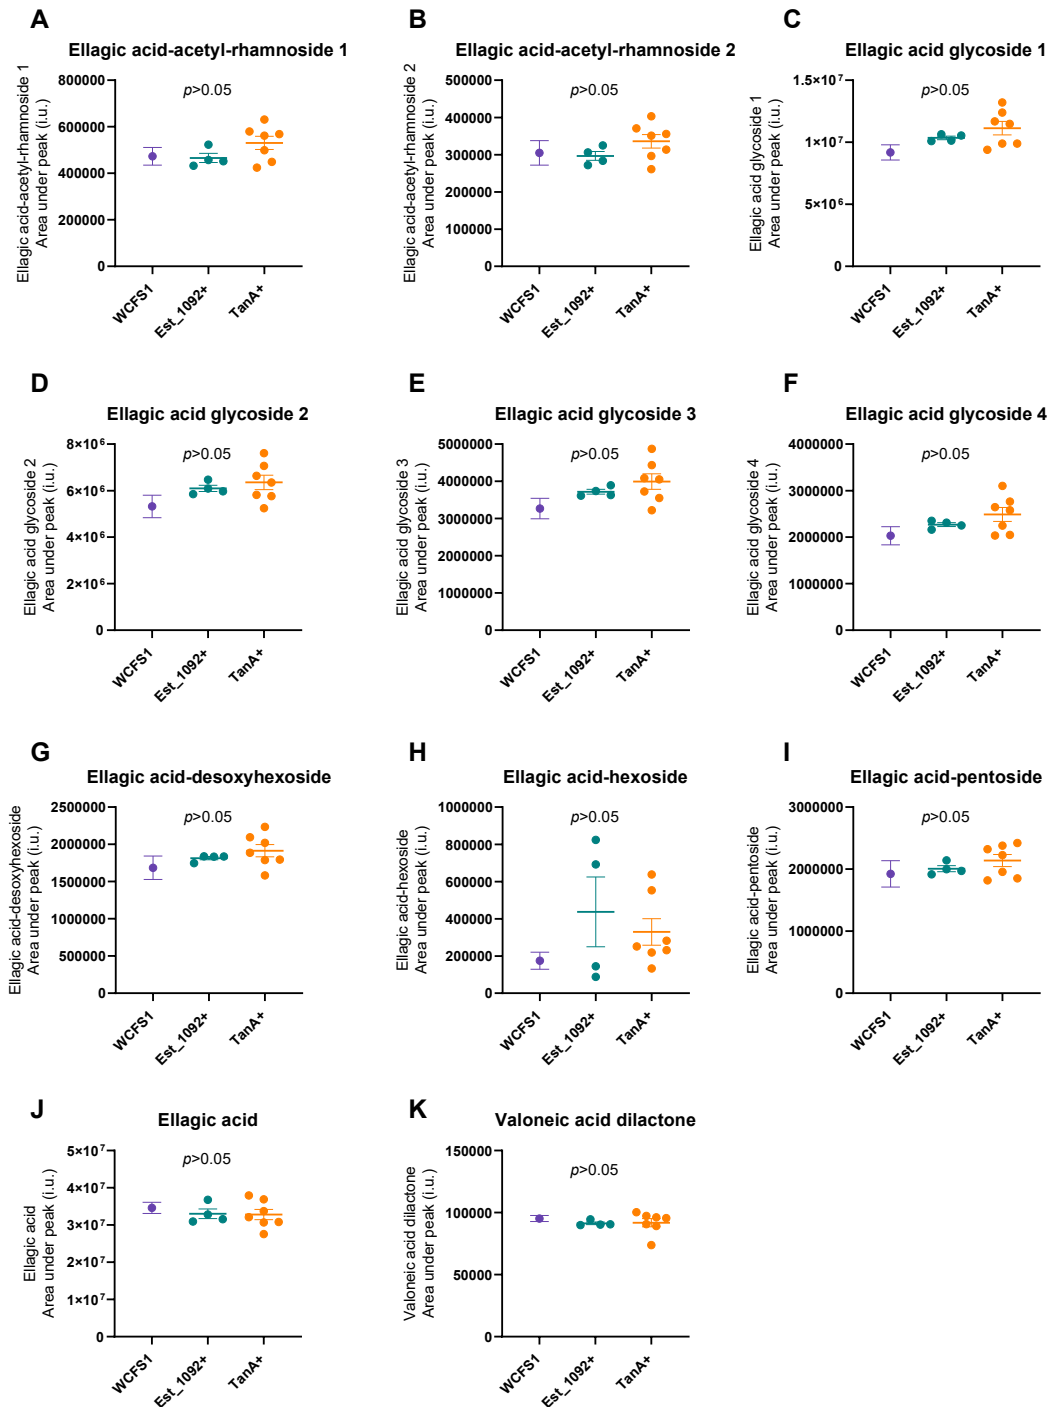

**Fig. S3 Non-ester camu-camu phenolic compounds at the end of the fermentation of *L. plantarum* strains with different tannase capacities.**

Each point represents the mean value of three independent experiments with one *L. plantarum* strain. Lines show mean values, and error bars indicate the standard error. In purple, WCFS1 (Est\_1092 and TanA lacking reference strain); in blue, Est\_1092+ strains (ATCC 8014, PROBI 56-12, PROBI 56-24, PROBI 59-12); in orange, TanA+ strains (ATCC 14917, PROBI S204, PROBI S126, RKG 1-473, RKG 1-500, RKG 2-219, and RKG 2-690). Statistical significance was determined by a One-Way ANOVA analysis with Tukey-Kramer multiple comparisons, where \* ( $p < 0.05$ ), \*\* ( $p < 0.01$ ), \*\*\* ( $p < 0.001$ ) and \*\*\*\* ( $p < 0.0001$ ). Statistical significance was determined by a One-Way ANOVA. If data were not distributed normally, the Kruskal–Wallis test by ranks was applied (ellagic acid desoxyhexoside, ellagic acid hexoside, valoneic acid dilactone).

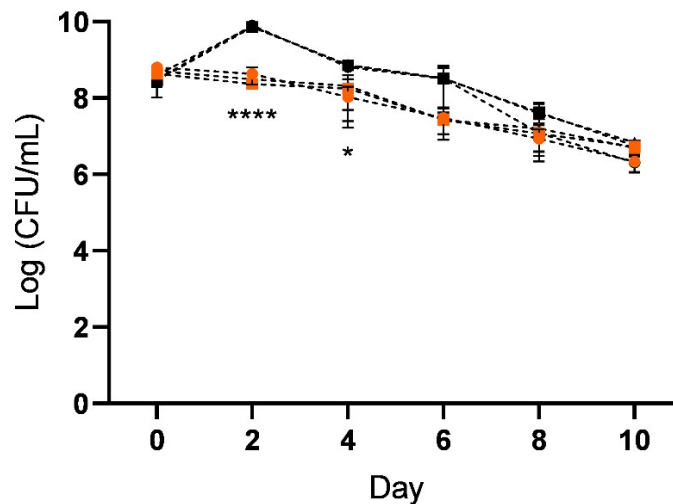

**Fig. S4 Effects of the camu-camu extract on the growth of *L. plantarum* strains.** Black symbols denote counts obtained during the growth of the strains in the control medium (without polyphenols), while orange symbols indicate the counts obtained during the growth of the strains in the camu-camu supplemented medium. *L. plantarum* WCFS1 ●, ○; Est\_1092+ *L. plantarum* strains, ■, □; TanA+ *L. plantarum* strains, ▲, △. Values at each time point are the average of at least two replicates. The mean and the standard deviation are shown. A Two-Way ANOVA followed by Šidák correction was used to compare the growth of the strains in the camu-camu supplemented medium with their growth in the control medium at each fermentation time. \*  $p \leq 0.05$ , \*\*\*\*  $p \leq 0.0001$ . CFU, colony-forming units.

## References

- 1 J. Donaghy, P. F. Kelly and A. M. McKay, *Appl Microbiol Biotechnol*, 1998, **50**, 257–60.
- 2 L. W. Sumner, A. Amberg, D. Barrett, M. H. Beale, R. Beger, C. A. Daykin, T. W. M. Fan, O. Fiehn, R. Goodacre, J. L. Griffin, T. Hankemeier, N. Hardy, J. Harnly, R. Higashi, J. Kopka, A. N. Lane, J. C. Lindon, P. Marriott, A. W. Nicholls, M. D. Reily, J. J. Thaden and M. R. Viant, *Metabolomics*, 2007, **3**, 211–221.
- 3 D. Fracassetti, C. Costa, L. Moulay and F. A. Tomás-Barberán, *Food Chem*, 2013, **139**, 578–588.
